# Supplementary material for: Involvement of miR-539-5p in the inhibition of de novo lipogenesis induced by resveratrol in white adipose tissue
Source: Royal Society of Chemistry journal article supplement (doi:10.1039/c5fo01090j), 2016-01-01
Supplement: c5fo01090j2.pdf [file c5fo01090j2.pdf]

**Figure S1.** Protein expression of PPAR $\gamma$  (A) and HSL (B) in adipose tissue from rats fed a high-fat, high-sucrose diet supplemented with resveratrol (Resveratrol group) or not (Control group) for 6 weeks (n=8). Values are presented as means  $\pm$  standard error of the means.
