# Supplementary figures and images for: Involvement of miR-539-5p in the inhibition of de novo lipogenesis induced by resveratrol in white adipose tissue
Source: Royal Society of Chemistry journal article supplement (doi:10.1039/c5fo01090j), 2016-01-01

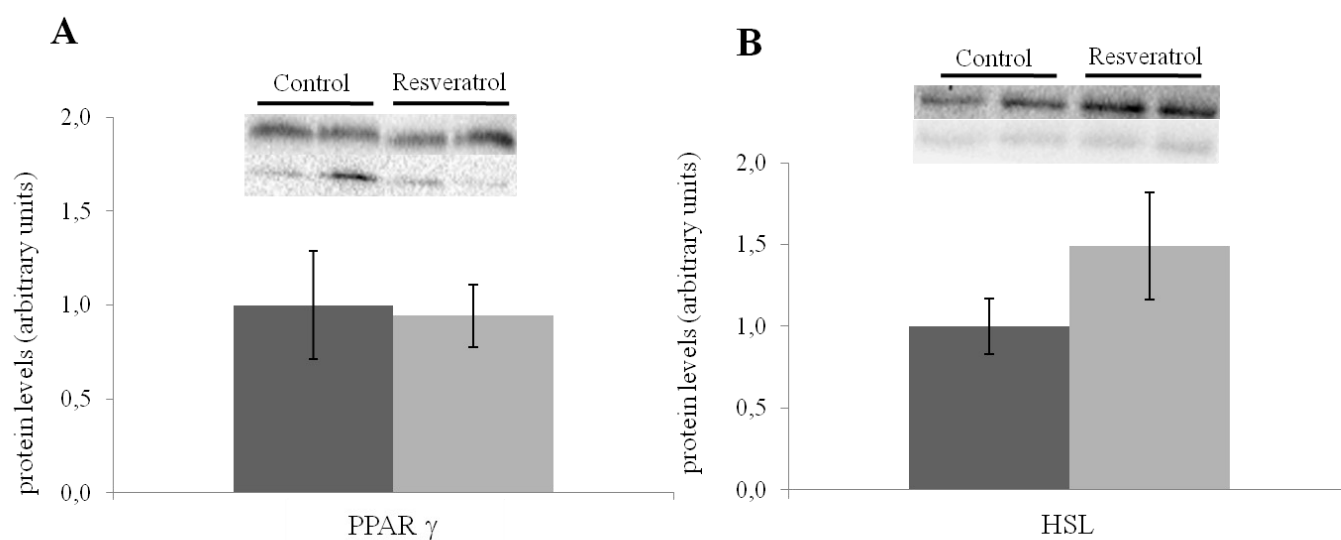

**Figure s1**

■ Control    ■ Resveratrol

Supplement: c5fo01090j1.pdf [file c5fo01090j1.pdf]
